# Supplementary material
Source: PubMed Central journal article supplement (PMC3494284)

# Fig. S6

F2a: Autoradiogram

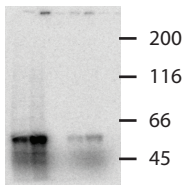

Fig. 2b: Autoradiogram

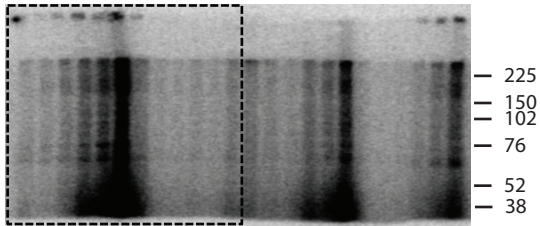

Fig. 3a: Autoradiogram

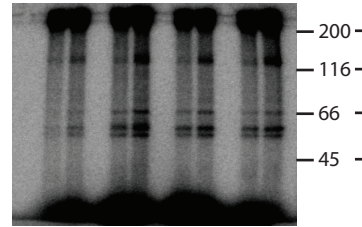

Fig. 3a: GFP Fig. 3a: IRE1 $\alpha$

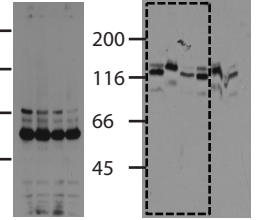

Fig. 3b: GFP

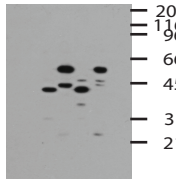

Fig. 3b: GFP

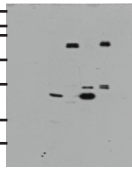

Fig. 3b: GFP

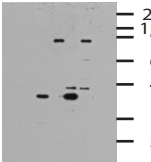

Fig. 3b: GFP

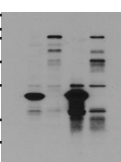

Fig. 3c: Autoradiogram

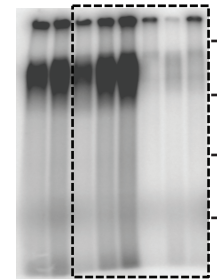

Fig. 3c: GFP

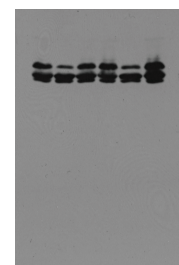

Fig. 3c: P-16

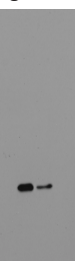

Fig. 3b: PERK

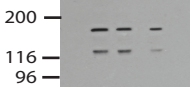

Fig. 3b: P-16

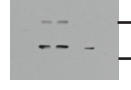

Fig. 3b: P-16

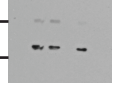

Fig. 3b: P-16

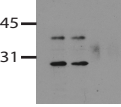

Fig. 3b: IRE1 $\alpha$

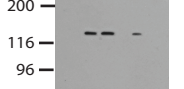

Fig. 3d: GFP

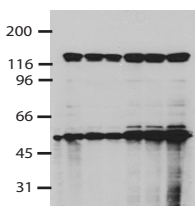

Fig. 3d: P-16

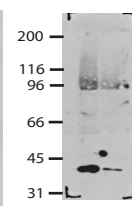

Fig. 3d: Autoradiogram

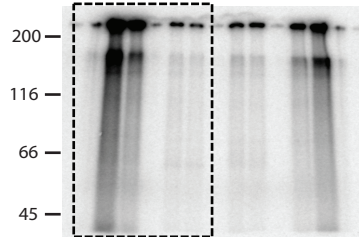

Fig. 3e: Autoradiogram

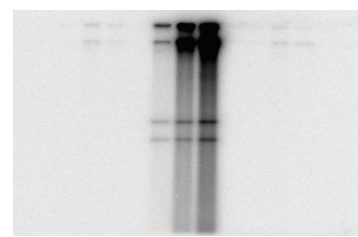

Fig. 3e: GFP

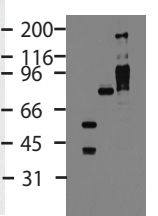

Fig. 4c: IRE1 $\alpha$ P

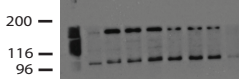

Fig. 4c: PERK<sup>P</sup>

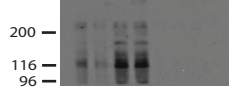

Fig. 4a: PERK

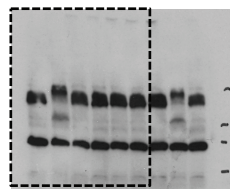

Fig. 4a: PERK<sup>P</sup>

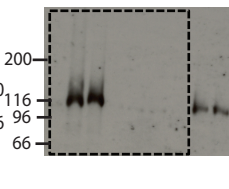

Fig. 4a: eIF2 $\alpha$

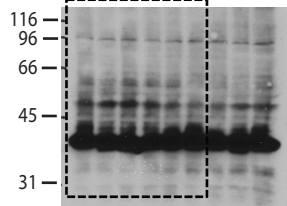

Fig. 4a: eIF2 $\alpha$ <sup>P</sup>

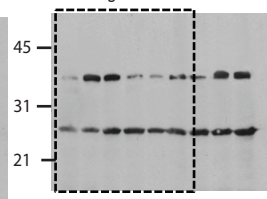

Fig. 4c: IRE1 $\alpha$

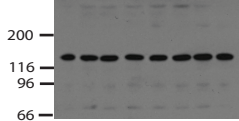

Fig. 4c: PERK

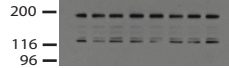

Fig. 4c: eIF2 $\alpha$ <sup>P</sup>

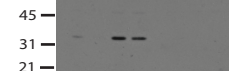

Fig. 4c: eIF2 $\alpha$

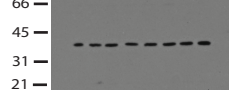

Fig. 4c: ATF4

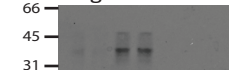

Fig. 4c: BiP

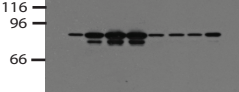

Fig. 4c: ATF6

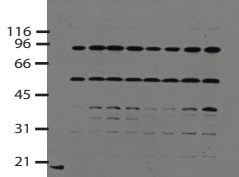

Fig. 4c: Tubulin

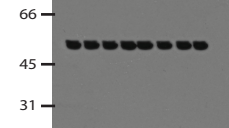

Fig. 4b: XBP-1 Splicing

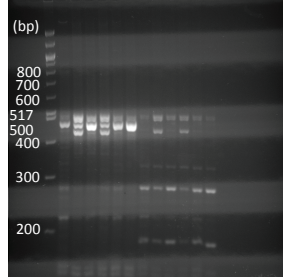

Fig. 4f: 32P-UTP

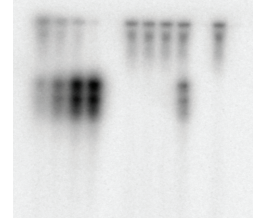

Fig. 5c: XBP-1 Splicing

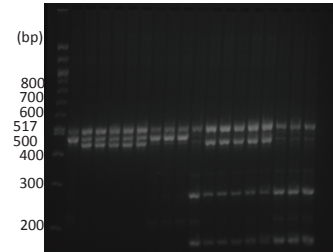

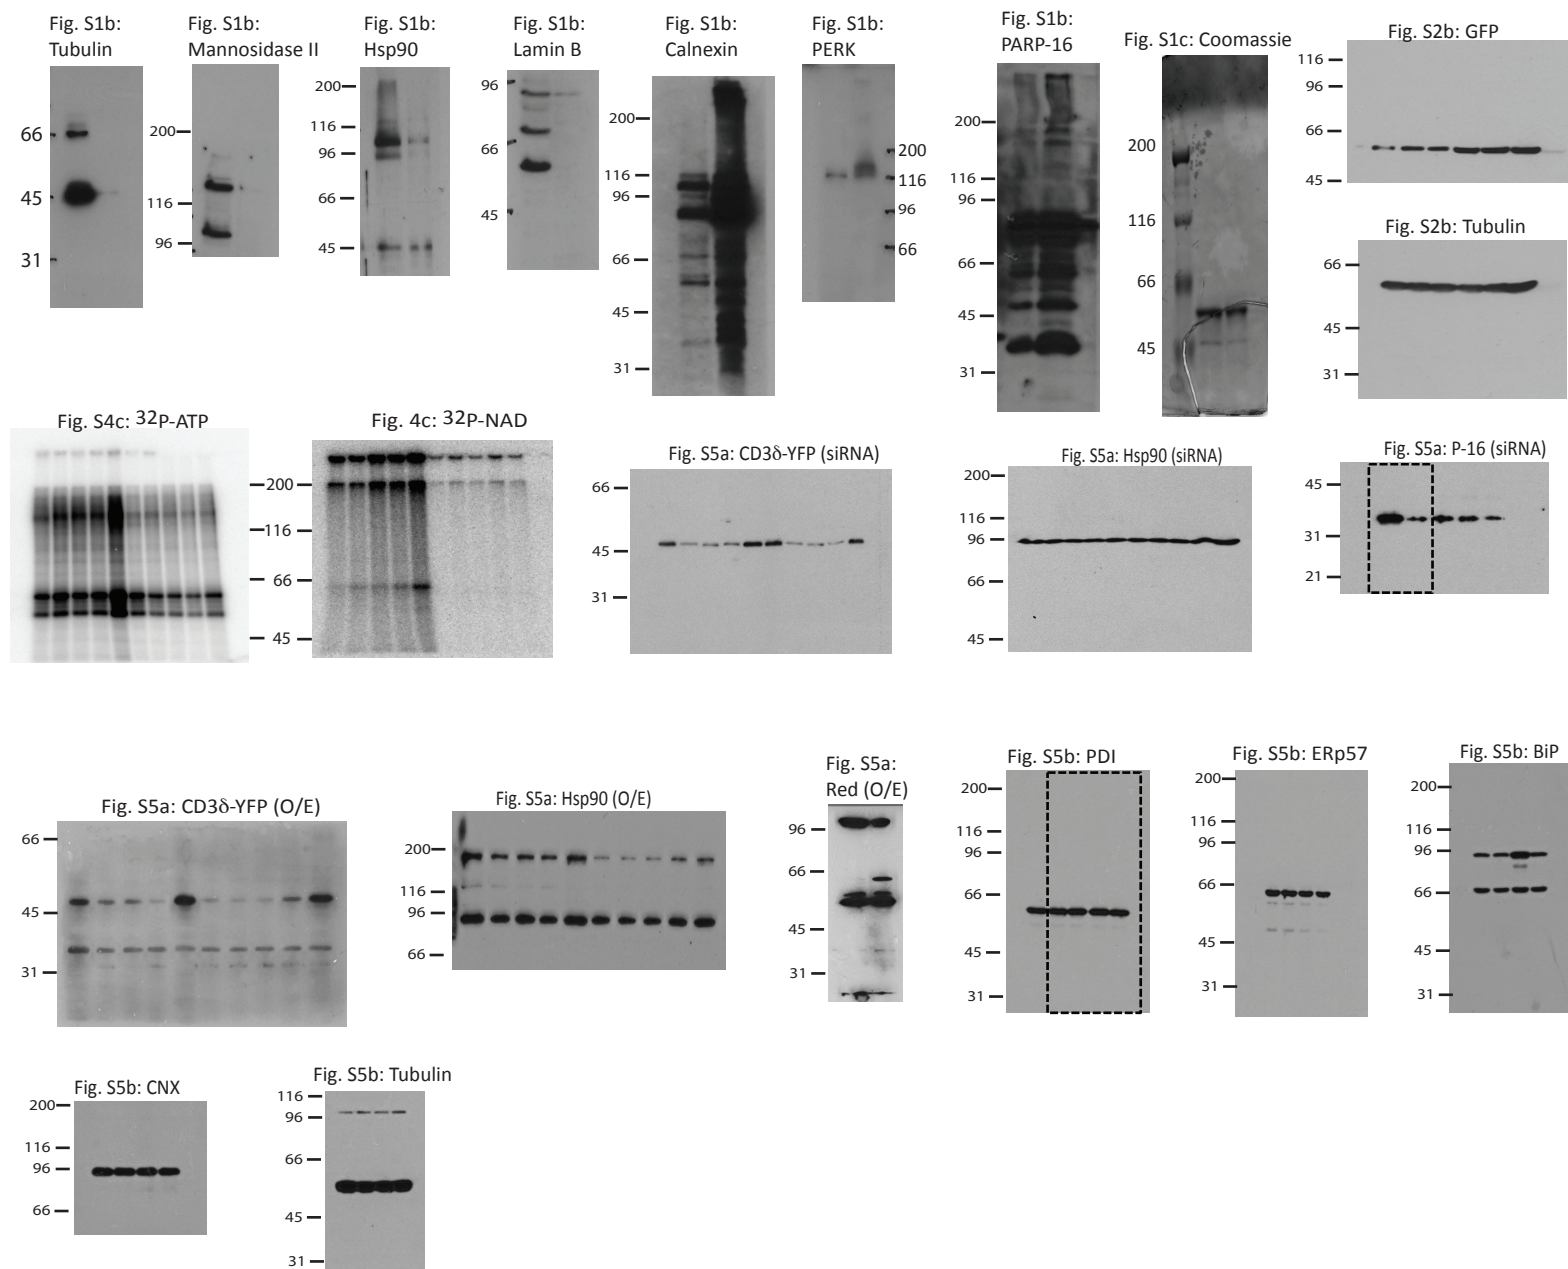

Supplement: NIHMS405063-supplement-8.pdf [file NIHMS405063-supplement-8.pdf]
